# Supplementary material
Source: PubMed Central journal article supplement (PMC3962705)
Supplement: NIHMS529379-supplement-01.pdf [file NIHMS529379-supplement-01.pdf]

## Supplementary Table 1

*Partial Correlations Between Reward-Related Frontal EEG Asymmetry and Reward-Related Anticipation Ratings*

| Anticipation Rating | Electrode pair |       |       |
|---------------------|----------------|-------|-------|
|                     | F7/F8          | F5/F6 | F3/F4 |
| Study One           | -.01           | .03   | .02   |
| Study Two           | .11            | .12   | .16   |
| Combined Sample     | .04            | .08   | .09   |

*Note.* Partial correlations are adjusted for task order. All correlations are *ns*.

## Supplementary Table 2

*Partial Correlations Between Threat-Related Startle Response and Threat-Related Anxiety**Ratings*

| Anxiety Rating  | Shock Condition |               |
|-----------------|-----------------|---------------|
|                 | Predictable     | Unpredictable |
| Study One       | .05             | .02           |
| Study Two       | -.16            | .02           |
| Combined Sample | .08             | .01           |

*Note.* Partial correlations are adjusted for task order. All correlations are *ns*.

## Supplementary Table 3

*Partial Correlations Between Average-Reference Reward-Related Frontal EEG Asymmetry and Threat-Related Startle Response in Combined Sample*

| Threat condition    | Electrode pair |          |           |          |           |          |
|---------------------|----------------|----------|-----------|----------|-----------|----------|
|                     | F7/F8          |          | F5/F6     |          | F3/F4     |          |
|                     | <i>pr</i>      | <i>p</i> | <i>pr</i> | <i>p</i> | <i>pr</i> | <i>p</i> |
| Predictable shock   | .13            | .15      | -.15      | .09      | .08       | .39      |
| Unpredictable shock | .16            | .07      | -.08      | .41      | .20       | .03      |

*Note.* Partial correlations are adjusted for task order and study.
